# Supplementary material for: Mitotic Catastrophe Induced in HeLa Tumor Cells by Photodynamic Therapy with Methyl-aminolevulinate
Source: MDPI journal article supplement (doi:10.3390/ijms20051229), 2019-03-11
Supplement: s1 [file s1]

Supplementary

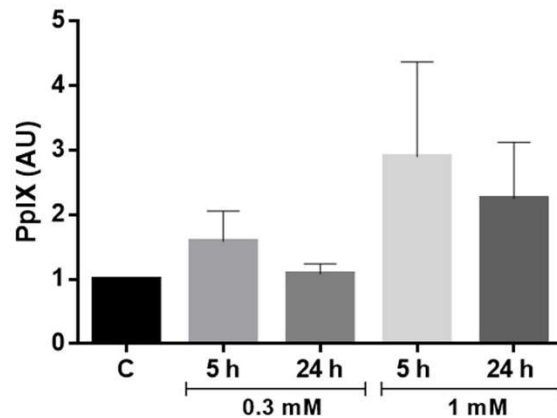

**Figure S1.** PpIX production in HaCaT cells after 0.3 or 1 mM MAL incubation for 5 or 24 h. Values were relativized to the basal PpIX level in controls (no MAL incubation). Each value corresponds to the mean  $\pm$  SD obtained from 3 independent experiments.

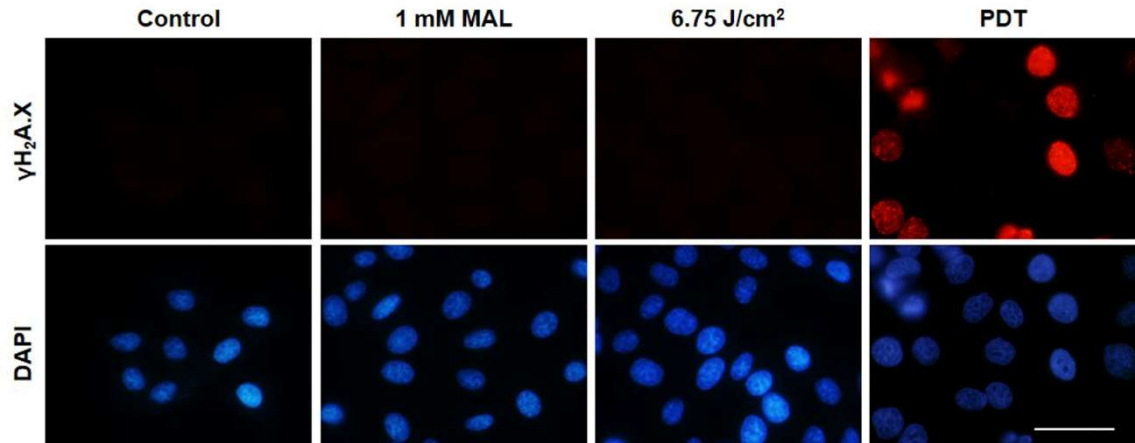

**Figure S2.**  $\gamma$ H2A.X expression determined by IF in untreated cells/controls), in cells exposed to 1 mM MAL (5 h) or to light (6.75 J/cm<sup>2</sup>) alone and after PDT. Scale bar: 50  $\mu$ m.

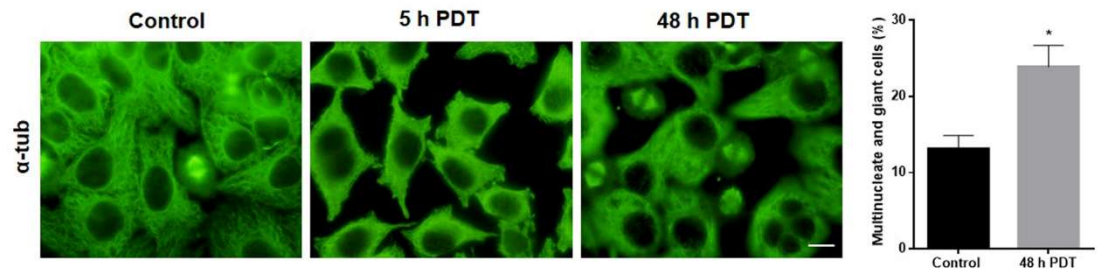

**Figure S3.** Microtubular alterations 5 and 48 h after PDT determined by IF for  $\alpha$ -tubulin. Percentage of multinucleate and giant cells 48 h after PDT. (\*  $p < 0.05$ ). Scale bar: 10  $\mu$ m.

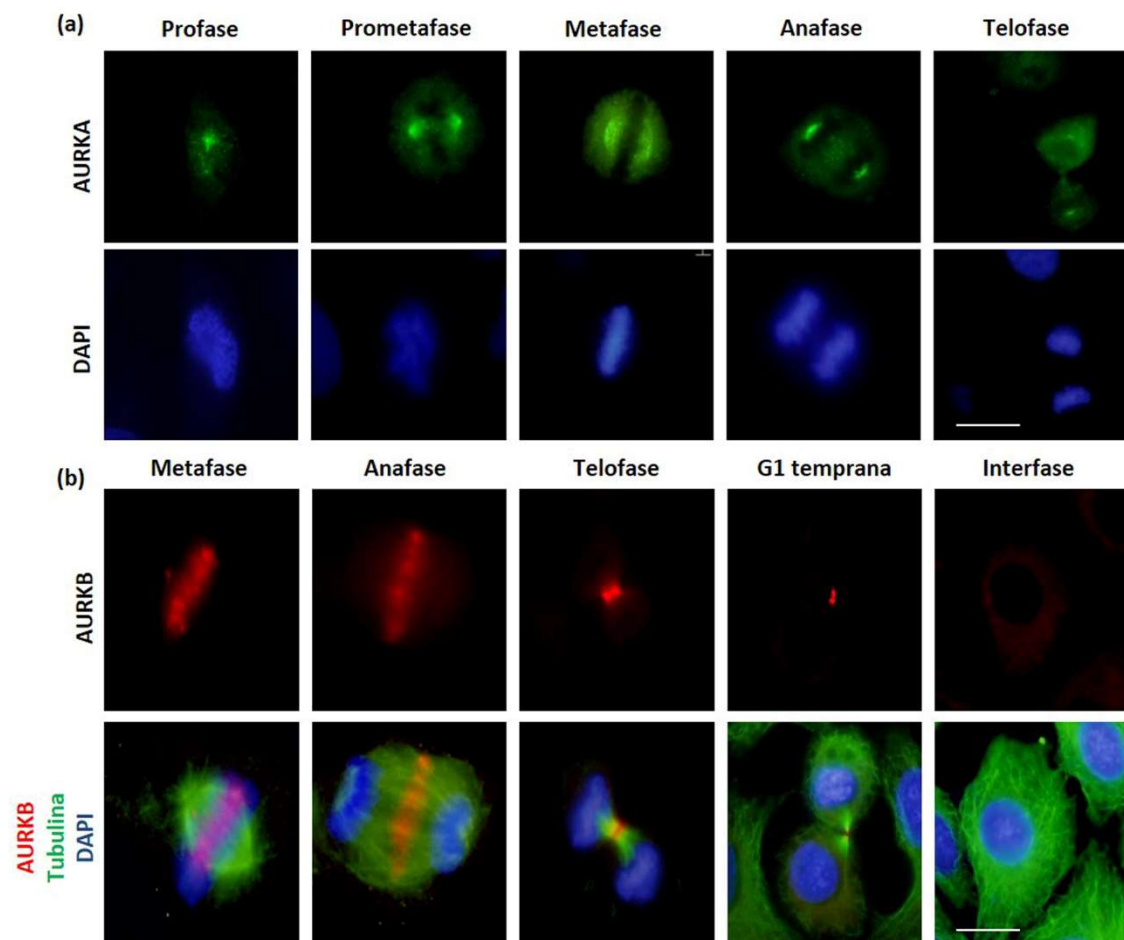

**Figure S4.** Location of AURKA (a) and AURKB (b) along cell cycle phases of control HeLa cells. Scale bar: 10  $\mu\text{m}$ .

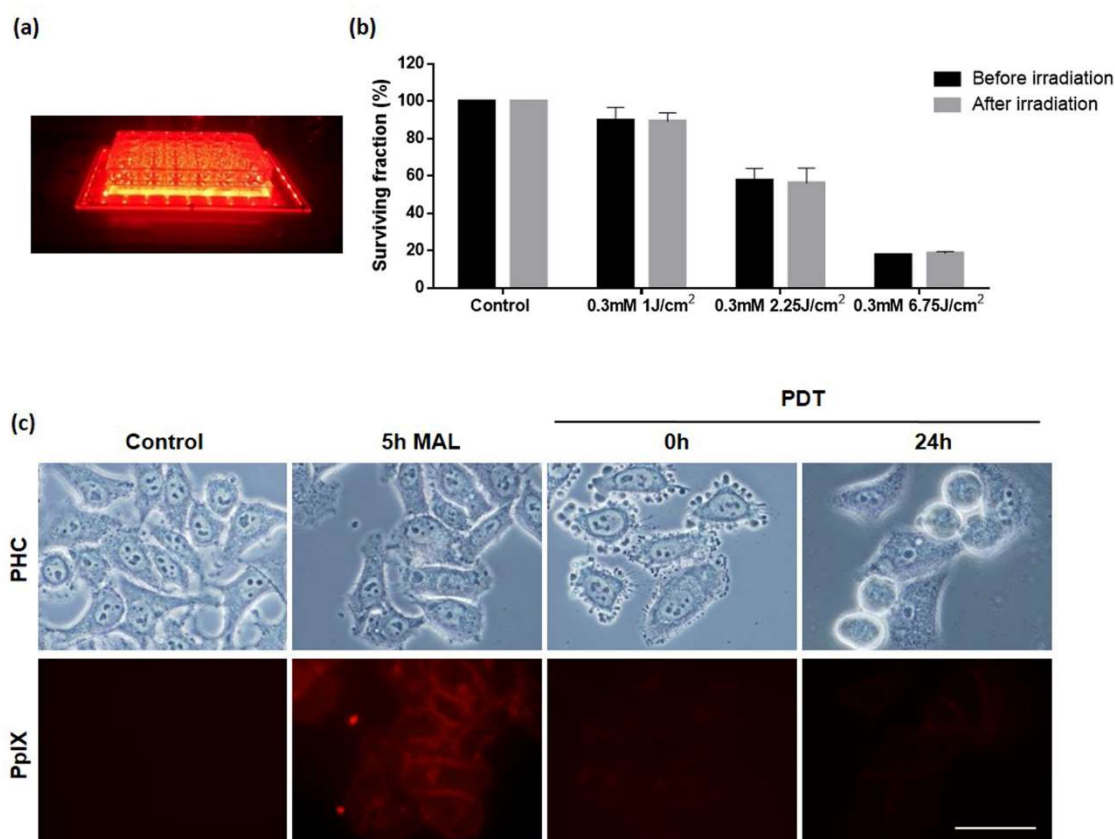

**Figure S5.** (a) Image during irradiation of 24 well plates; irradiation was performed from the bottom of the plates. (b) Surviving fraction after MAL-PDT refreshed before/after irradiation. (c) Red PpIX fluorescence expression in control cells (without MAL incubation), after 5 h incubation with MAL, and immediately and 24 h after PDT. Scale bar: 50  $\mu$ m.
